# Supplementary material
Source: PubMed Central journal article supplement (PMC2711806)
Supplement: 90381.2008_1.pdf [file 90381.2008_1.pdf]

## Supplemental Data

### IL-6 Cytoprotection In Hyperoxic Acute Lung Injury Occurs Via PI3 kinase/AKT-

#### Mediated Bax Phosphorylation

Narasaiah Kolliputi and Aaron B. Waxman

#### Transfection efficiency

GFP containing Bax cDNA were transfected into HUVEC cells using Lipofectamine™ 2000-plus according to the manufacturer's instructions (Invitrogen, Carlsbad, CA). Cells were cultured to 90% confluence in six-well plates and were transfected with a total of 4- $\mu$ g of plasmid constructs. To determine the transfection efficiency fluorescence was checked using an inverted fluorescent microscope (supplementary figure.1). Transfection efficiency was calculated by counting percentage of fluorescent cells versus the total number of cell in a given field of area. We observed 70-86% of transfection efficiency in HUVEC cells.

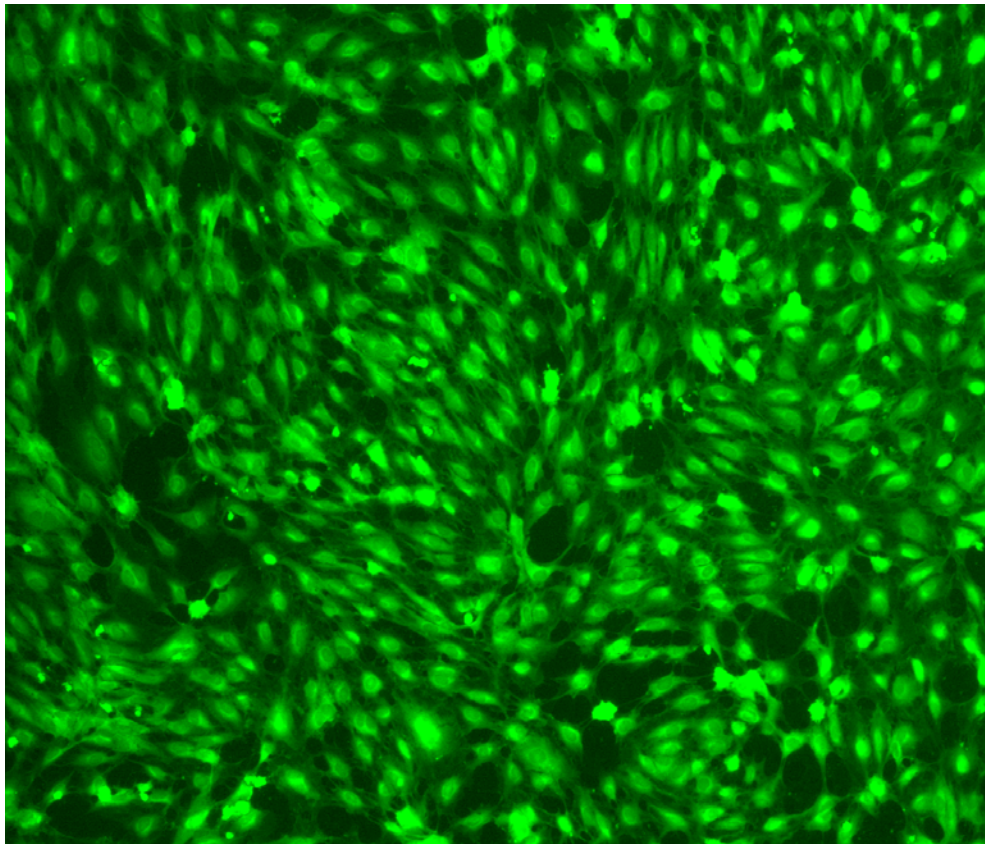

**Supplementary figure 1:** Photograph of GFP transfected HUVEC cells obtained with inverted fluorescent microscope.
